# Supplementary material for: Purine Metabolism Alterations in Patients with Chronic Heart Failure: A Cross-Sectional Study of Associations with Iron Status, Oxidative Stress, and Anemia
Source: MDPI journal article supplement (doi:10.3390/metabo16060432), 2026-06-22
Supplement: s1 [file metabolites-4321155-supplementary.pdf › metabolites-4321155-supplementary.pdf]

## Supplementary Materials

**Supplementary Table S1.** Laboratory parameters in patients with chronic heart failure stratified by phenotype and anemia status

| Parameter                                              | HFpEF<br>with an<br>(n=29)              | HFpEF<br>without<br>an (n=22)            | HFmrEF<br>with an<br>(n=22)              | HFmrEF<br>without an<br>(n=42)           | HFrEF<br>with an<br>(n=20)              | HFrEF<br>without<br>an (n=41)           |
|--------------------------------------------------------|-----------------------------------------|------------------------------------------|------------------------------------------|------------------------------------------|-----------------------------------------|-----------------------------------------|
| Serum iron<br>( $\mu\text{mol/L}$ )                    | 6.6 (3.6–<br>11.5) <sup>a</sup>         | 16.1<br>(11.6–<br>21.9) <sup>b</sup>     | 7.8 (6.1–<br>16.3) <sup>ab</sup>         | 15.7<br>(11.1–<br>20.4) <sup>b</sup>     | 6.3 (4.6–<br>10.2) <sup>c</sup>         | 12.0 (7.5–<br>16.5) <sup>b</sup>        |
| Ferritin<br>( $\mu\text{g/L}$ )                        | 32.5<br>(12.1–<br>143.8) <sup>a</sup>   | 98.8<br>(52.1–<br>162.8) <sup>ab</sup>   | 75.4<br>(32.0–<br>305.7) <sup>ab</sup>   | 113.2<br>(66.83–<br>150.5) <sup>ab</sup> | 78.9<br>(36.7–<br>193.3) <sup>ab</sup>  | 131.0<br>(62.3–<br>187.7) <sup>b</sup>  |
| Hemoglobin<br>(g/L)                                    | 104.0<br>(96.0–<br>112.5) <sup>a</sup>  | 143.0<br>(131.8–<br>152.3) <sup>b</sup>  | 111.5<br>(84.0–<br>116.3) <sup>a</sup>   | 148.0<br>(137.5–<br>153.5) <sup>b</sup>  | 108.0<br>(97.0–<br>123.0) <sup>a</sup>  | 143.0<br>(137.5–<br>154.0) <sup>b</sup> |
| Platelets<br>( $\times 10^9/\text{L}$ )                | 281.0<br>(230.5–<br>379.0) <sup>a</sup> | 213.0<br>(185.3–<br>273.0) <sup>ab</sup> | 235.0<br>(158.3–<br>262.0) <sup>ab</sup> | 219.0<br>(188.8–<br>261.0) <sup>b</sup>  | 205.5<br>(175.5–<br>247.5) <sup>b</sup> | 205.0<br>(177.4–<br>241.5) <sup>b</sup> |
| Guanine<br>( $\mu\text{mol/L}$ )                       | 183.0<br>(146.0–<br>246.0)              | 219.0<br>(172.0–<br>291.5)               | 189.0<br>(156.5–<br>277.5)               | 195.0<br>(125.0–<br>248.0)               | 193.0<br>(145.3–<br>310.5)              | 206.0<br>(155.0–<br>265.5)              |
| Hypoxanthine<br>( $\mu\text{mol/L}$ )                  | 154.0<br>(115.0–<br>197.0)              | 173.0<br>(126.8–<br>244.8)               | 155.5<br>(126.0–<br>216.0)               | 158.5<br>(117.3–<br>201.8)               | 167.0<br>(127.3–<br>259.3)              | 168.0<br>(126.5–<br>222.5)              |
| Adenine<br>( $\mu\text{mol/L}$ )                       | 137.0<br>(78.5–<br>162.0)               | 138.5<br>(90.0–<br>193.0)                | 128.0<br>(99.5–<br>160.8)                | 128.5<br>(90.5–<br>171.3)                | 135.5<br>(93.0–<br>194.0)               | 140.0<br>(104.5–<br>191.0)              |
| Xanthine<br>( $\mu\text{mol/L}$ )                      | 182.0<br>(140.0–<br>218.0)              | 195.0<br>(161.0–<br>244.3)               | 179.5<br>(137.0–<br>247.8)               | 174.0<br>(126.3–<br>236.0)               | 186.5<br>(132.5–<br>284.3)              | 202.0<br>(154.5–<br>252.0)              |
| Uric acid<br>( $\mu\text{mol/L}$ )                     | 192.0<br>(149.5–<br>251.5)              | 239.5<br>(182.3–<br>298.3)               | 210.0<br>(172.5–<br>310.3)               | 195.5<br>(139.3–<br>246.0)               | 232.0<br>(169.0–<br>294.8)              | 207.0<br>(159.5–<br>292.5)              |
| Lipid<br>peroxidation<br>products<br>(LPO)             | 0.160<br>(0.135–<br>0.275)              | 0.140<br>(0.090–<br>0.238)               | 0.160<br>(0.138–<br>0.268)               | 0.155<br>(0.110–<br>0.275)               | 0.195<br>(0.133–<br>0.268)              | 0.160<br>(0.120–<br>0.250)              |
| Advanced<br>oxidation<br>protein<br>products<br>(AOPP) | 0.200<br>(0.150–<br>0.390)              | 0.235<br>(0.140–<br>0.423)               | 0.195<br>(0.130–<br>0.295)               | 0.210<br>(0.128–<br>0.275)               | 0.155<br>(0.113–<br>0.193)              | 0.210<br>(0.145–<br>0.255)              |

Note: Values sharing the same superscript letter are not significantly different (Dunn's multiple comparisons test,  $p < 0.05$ ).
